# Supplementary material for: Scalable fabrication of porous membrane incorporating human extracellular matrix-like collagen for guided bone regeneration
Source: Royal Society of Chemistry journal article supplement (doi:10.1039/d4tb00962b), 2024-01-01
Supplement: d4tb00962b1.pdf [file d4tb00962b1.pdf]

## Supplementary information for

# Scalable Fabrication of Porous Membrane Incorporating Human Extracellular Matrix-like Collagen for Guided Bone Regeneration

**Authors:** Qingyi Wang<sup>1</sup>, Feng Zhou<sup>1,2</sup>, Tiecheng Qiu<sup>3</sup>, Yiling Liu<sup>3</sup>, Wenxin Luo<sup>1</sup>, Zhanqi Wang<sup>1,2</sup>, Haiyun Li<sup>1,2</sup>, E Xiao<sup>4</sup>, Qiang Wei<sup>3,4\*</sup>, Yingying Wu<sup>1,2\*</sup>

### Affiliations:

<sup>1</sup>State Key Laboratory of Oral Diseases, National Clinical Research Center for Oral Diseases, West China Hospital of Stomatology, Sichuan University, Chengdu, China

<sup>2</sup>Department of Oral Implantology, West China Hospital of Stomatology, Sichuan University, Chengdu, China

<sup>3</sup>College of Polymer Science and Engineering, State Key Laboratory of Polymer Materials and Engineering, Sichuan University, Chengdu, China

<sup>4</sup>Hunan Maybio Bio-Pharmaceutical Co., Ltd., Changsha 410000, China

\*Address correspondence to: wei@scu.edu.cn (Q.W.); yywdentist@163.com (Y.W.)

**Table S1** Primers sequence used for qPCR.

| Primer name       | Primer Sequence          |
|-------------------|--------------------------|
| $\beta$ -actin F  | CATCCGTAAAGACCTCTAGCCAAC |
| $\beta$ -actin R  | ATGGAGCCACCGATCCACA      |
| Alp F             | AACCCAGACACAAGCATTC      |
| Alp R             | GCCTTTGAGGTTTTTGGTCA     |
| Runx2 F           | GGTACTTCGTCAGCATCTATCAG  |
| Runx2 R           | GCTTCCGTCAGCGTCAACAC     |
| Col1 $\alpha$ 1 F | GCTTCACCTACAGCACCCCTTGT  |
| Col1 $\alpha$ 1 R | TGACTGTCTTGCCCCAAGTTC    |

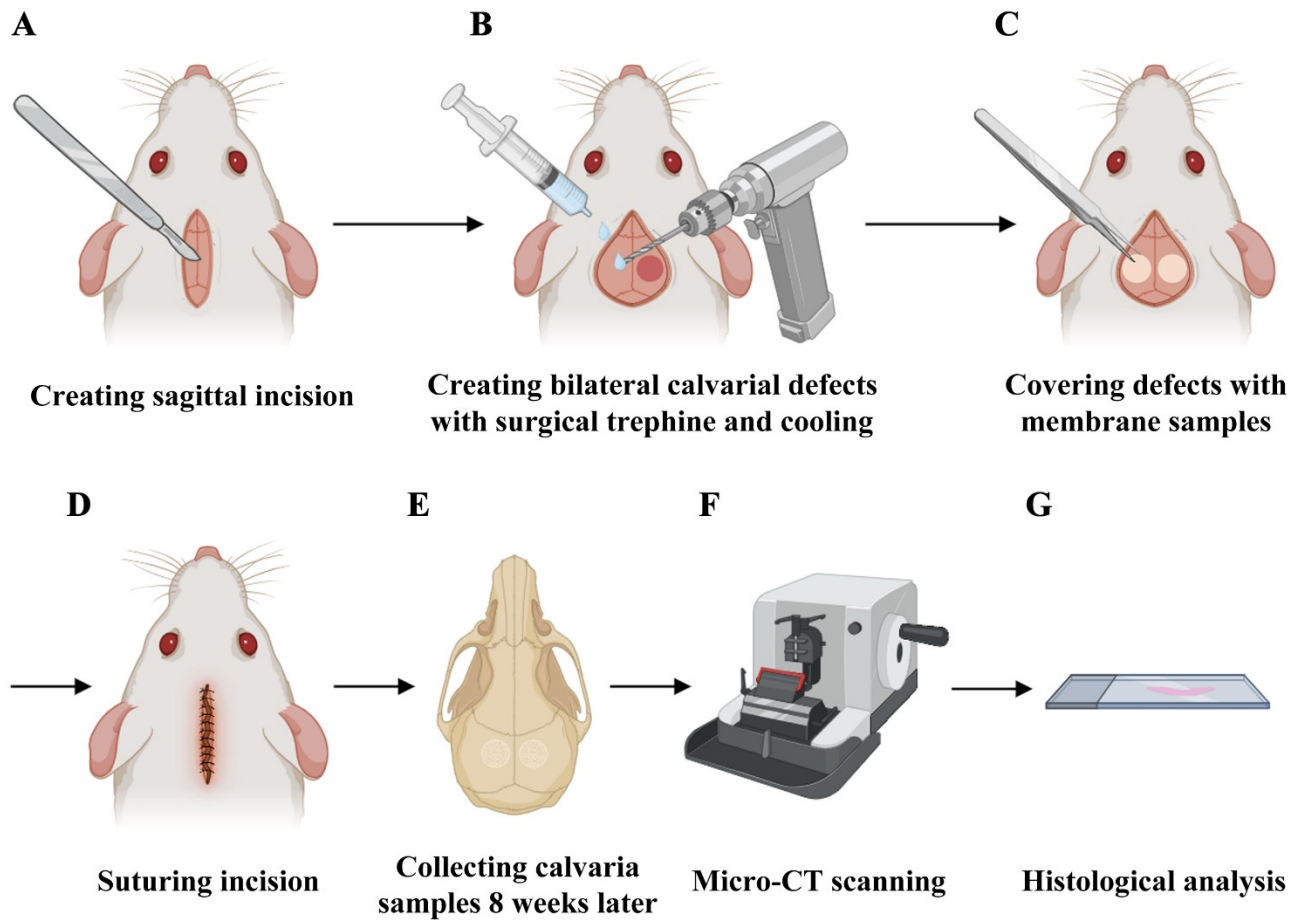

**Fig. S1** *In vivo* biological evaluation process. (A) Creating a sagittal incision with a length of 2 cm. (B) Creating bilateral circular calvarial defects 5-mm in diameter with a surgical trephine operated at 1500 rpm and cooled with sterile saline solution drip. (C) Covering calvarial defects with 6-mm in diameter membrane samples. (D) Suturing incision. (E) Euthanizing rats 8 weeks after surgery to collect calvaria samples. (F) Using micro-CT to examine the new bone formation at the circular bone defect location. (G) Making histological sections and staining sections with hematoxylin and eosin (HE) or Masson's trichrome (MT).
